# Supplementary material for: The Central Paratethys Sea—rise and demise of a Miocene European marine biodiversity hotspot
Source: PubMed Central journal article supplement (PMC11250865; doi:10.1038/s41598-024-67370-6), 2024-07-15

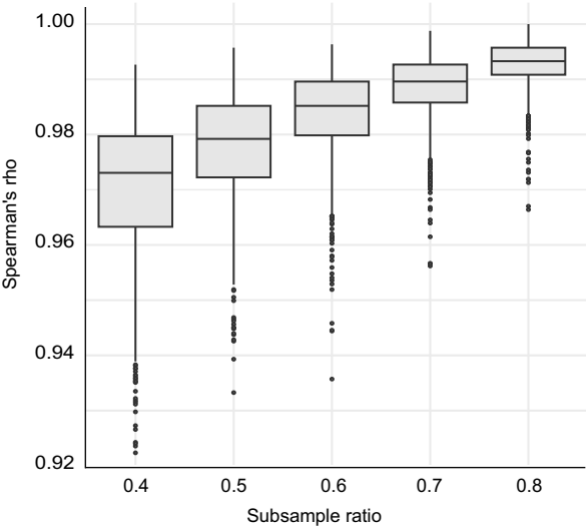

Supplement: 41598_2024_67370_MOESM3_ESM.pdf [file 41598_2024_67370_MOESM3_ESM.pdf]
