# Supplementary material for: The Central Paratethys Sea—rise and demise of a Miocene European marine biodiversity hotspot
Source: PubMed Central journal article supplement (PMC11250865; doi:10.1038/s41598-024-67370-6), 2024-07-15
Supplement: 41598_2024_67370_MOESM4_ESM.pdf [file 41598_2024_67370_MOESM4_ESM.pdf]

| Superfamily      | Family            | Subfamily      | Genus                 | Species                 | Author            | proconch | littoral | shallow | deep | Karpatian   | Ottangian | Karpatian | Early Badenian (Carpathian Basin) |                |           |                        |                             |                |                                             |                                          |                                                    |                                |
|------------------|-------------------|----------------|-----------------------|-------------------------|-------------------|----------|----------|---------|------|-------------|-----------|-----------|-----------------------------------|----------------|-----------|------------------------|-----------------------------|----------------|---------------------------------------------|------------------------------------------|----------------------------------------------------|--------------------------------|
| Architectonicoid | Architectonicidae | Architectonini | <i>Simplexollata</i>  | <i>simplex</i>          | (Bronn, 1831)     | hetero   | 0        | 0       | 1    | Burdigallan | 18.1      | 21.1      | Burdigallan                       | 18.1           | 21.1      | Eggenburgian 12.072534 | 47.826518                   | Germany        | Kaltenbachgraben, Gerneggab                 |                                          |                                                    |                                |
| Architectonicoid | Architectonicidae | Architectonini | <i>Simplexollata</i>  | <i>anticollata</i>      | Harzhauser & La   | hetero   | 0        | 0       | 1    | Burdigallan | 18        | 21        | Burdigallan                       | 18             | 21        | Eggenburgian 15.818317 | 48.441222                   | Austria        | Fels am Wagr Fels am Wagram                 |                                          |                                                    |                                |
| Architectonicoid | Architectonicidae | Architectonini | <i>Simplexollata</i>  | <i>exmoniliferus</i>    | (Sacco, 1892)     | hetero   | 0        | 0       | 1    | Burdigallan | 18.1      | 21.1      | Burdigallan                       | 18.1           | 21.1      | Eggenburgian 15.717995 | 48.618186                   | Austria        | Mörtersdorf                                 |                                          |                                                    |                                |
| Architectonicoid | Architectonicidae | Architectonini | <i>Helicax</i>        | <i>miser</i>            | (Dujardin, 1837)  | hetero   | 0        | 1       | 0    | Burdigallan | 18.1      | 21.1      | Burdigallan                       | 18.1           | 21.1      | Eggenburgian 15.716832 | 48.651105                   | Austria        | María Dreieich Maria Dreieichen, Mödl, Nomo |                                          |                                                    |                                |
| Architectonicoid | Architectonicidae | Architectonini | <i>Pseudotorinia</i>  | <i>grasemanni</i>       | Harzhauser & La   | hetero   | 0        | 1       | 0    | Burdigallan | 18.1      | 21.1      | Burdigallan                       | 18.1           | 21.1      | Eggenburgian 15.820556 | 48.659845                   | Austria        | Gauderners Gauderners/Eggenburg/Maige       |                                          |                                                    |                                |
| Architectonicoid | Architectonicidae | Architectonini | <i>Helicax</i>        | <i>berthae</i>          | (Boettger, 1902)  | hetero   | 0        | 1       | 0    | Burdigallan | 17.2      | 18.1      | Ottangian                         | 15.897440      | 48.740430 | Austria                | Obermarkers Obermarkersdorf |                |                                             |                                          |                                                    |                                |
| Architectonicoid | Architectonicidae | Architectonini | <i>Ammotectonica</i>  | <i>gregorovae</i>       | Harzhauser & La   | hetero   | 0        | 0       | 1    | Ottangian   | 15.897440 | 17.2      | Ottangian                         | 15.897440      | 17.2      | Ottangian              | 15.897440                   | 17.2           | Ottangian                                   | Alharting Alharting (Ottangian)          |                                                    |                                |
| Architectonicoid | Architectonicidae | Architectonini | <i>Granosolarium</i>  | <i>semilaevis</i>       | (Sacco, 1892)     | hetero   | 0        | 0       | 1    | Ottangian   | 14.238887 | 17.2      | Ottangian                         | 14.238887      | 17.2      | Ottangian              | 14.238887                   | 17.2           | Ottangian                                   | Iona Valley Iona Valley (Ottangian)      |                                                    |                                |
| Architectonicoid | Architectonicidae | Architectonini | <i>Pseudotorinia</i>  | <i>marthae</i>          | (Boettger, 1902)  | hetero   | 0        | 0       | 1    | Ottangian   | 20.060571 | 17.2      | Ottangian                         | 20.060571      | 17.2      | Ottangian              | 20.060571                   | 17.2           | Ottangian                                   | Ottangian                                |                                                    |                                |
| Architectonicoid | Architectonicidae | Architectonini | <i>Spiralox</i>       | <i>cornicola</i>        | (Boettger, 1902)  | hetero   | 0        | 0       | 1    | Ottangian   | 16.388330 | 16        | Karpatian                         | 16.388330      | 16        | Karpatian              | 16.388330                   | 16             | Karpatian                                   | Laa an der Th. Laa, Neupoppersdorf       |                                                    |                                |
| Architectonicoid | Architectonicidae | Architectonini | <i>Solatiox</i>       | <i>transversa</i>       | Harzhauser & La   | hetero   | 0        | 0       | 1    | Ottangian   | 17.378359 | 16        | Karpatian                         | 17.378359      | 16        | Karpatian              | 17.378359                   | 16             | Karpatian                                   | Cerová-Liesk Cerová-Lieskové             |                                                    |                                |
| Architectonicoid | Architectonicidae | Architectonini | <i>Solatiox</i>       | <i>košťejana</i>        | (Boettger, 1907)  | hetero   | 0        | 0       | 1    | Ottangian   | 16.351186 | 16        | Karpatian                         | 16.351186      | 16        | Karpatian              | 16.351186                   | 16             | Karpatian                                   | Stetten (Teirit) Stetten                 |                                                    |                                |
| Architectonicoid | Architectonicidae | Architectonini | <i>Ammotectonica</i>  | <i>soproniensis</i>     | (Strauss, 1960)   | hetero   | 0        | 1       | 0    | Ottangian   | 13.653628 | 17.2      | Ottangian                         | 13.653628      | 17.2      | Ottangian              | 13.653628                   | 17.2           | Ottangian                                   | Niederkreuzs Niederkreuzstetten          |                                                    |                                |
| Architectonicoid | Architectonicidae | Architectonini | <i>Solatiox</i>       | <i>tavianii</i>         | Harzhauser & La   | hetero   | 0        | 0       | 1    | Ottangian   | 16.476216 | 16        | Karpatian                         | 16.476216      | 16        | Karpatian              | 16.476216                   | 16             | Karpatian                                   | Kleinersdorf Kleinersdorf, Oberrahnsdorf |                                                    |                                |
| Architectonicoid | Architectonicidae | Architectonini | <i>Helicax</i>        | <i>globosus</i>         | Harzhauser & La   | hetero   | 0        | 0       | 1    | Ottangian   | 18.095970 | 16        | Karpatian                         | 18.095970      | 16        | Karpatian              | 18.095970                   | 16             | Karpatian                                   | Bánapuzsa Bánapuzsa                      |                                                    |                                |
| Architectonicoid | Architectonicidae | Architectonini | <i>Nipteraxis</i>     | <i>deformatus</i>       | Harzhauser & La   | hetero   | 0        | 0       | 1    | Ottangian   | 16.373018 | 16        | Karpatian                         | 16.373018      | 16        | Karpatian              | 16.373018                   | 16             | Karpatian                                   | Kernabrum Kernabrum                      |                                                    |                                |
| Architectonicoid | Architectonicidae | Architectonini | <i>Nipteraxis</i>     | <i>monilifer</i>        | (Bronn, 1831)     | hetero   | 0        | 0       | 1    | Ottangian   | 16.400509 | 16        | Karpatian                         | 16.400509      | 16        | Karpatian              | 16.400509                   | 16             | Karpatian                                   | Weinsteig Weinsteig                      |                                                    |                                |
| Architectonicoid | Architectonicidae | Architectonini | <i>Nipteraxis</i>     | <i>posgayae</i>         | (Kovács Leél-Ős)  | hetero   | 0        | 0       | 1    | Ottangian   | 50.658170 | 13.8      | Badenian                          | mit20.514560   | 13.8      | Badenian               | mit20.514560                | 13.8           | Badenian                                    | Korymka Korymka                          |                                                    |                                |
| Cerithioidea     | Batillariidae     | Batillariinae  | <i>Tiarocerithium</i> | <i>pictum</i>           | (de Basterot, 18  | 2.00     | 1        | 0       | 0    | Langhian    | 13.8      | 14.7      | Badenian                          | mit16.63906    | 13.8      | 14.7                   | Badenian                    | mit16.63906    | 13.8                                        | 14.7                                     | Czech Republi Boršov (= Por Boršov (= Porstendorf) |                                |
| Cerithioidea     | Batillariidae     | Batillariinae  | <i>Tiarocerithium</i> | <i>submitralis</i>      | (Eichwald, 1851)  | u        | 1        | 0       | 0    | Langhian    | 14.7      | 16        | Badenian                          | (low.16.063113 | 14.7      | 16                     | Badenian                    | (low.16.063113 | 14.7                                        | 16                                       | Badenian                                           | Grund, Gaudernersdorf, Immedes |
| Cerithioidea     | Batillariidae     | Batillariinae  | <i>Tiarapirenella</i> | <i>tabulata</i>         | (Hörnes, 1856)    | u        | 1        | 0       | 0    | Langhian    | 13.8      | 14.7      | Badenian                          | (mit16.637163  | 13.8      | 14.7                   | Badenian                    | (mit16.637163  | 13.8                                        | 14.7                                     | Czech Republi Ústec                                |                                |
| Cerithioidea     | Batillariidae     | Batillariinae  | <i>Lampanelia</i>     | <i>obliquistoma</i>     | (Seguenza, 1825   | 1.25     | 1        | 0       | 0    | Langhian    | 13.8      | 14.7      | Badenian                          | (mit16.637163  | 13.8      | 14.7                   | Badenian                    | (mit16.637163  | 13.8                                        | 14.7                                     | Czech Republi Ústec                                |                                |
| Cerithioidea     | Batillariidae     | Batillariinae  | <i>Granulolabium</i>  | <i>bicincta</i>         | (Hörnes, 1855)    | u        | 1        | 0       | 0    | Langhian    | 13.8      | 14.7      | Badenian                          | (low.16.063113 | 13.8      | 14.7                   | Badenian                    | (low.16.063113 | 13.8                                        | 14.7                                     | Czech Republi Ústec                                |                                |
| Cerithioidea     | Batillariidae     | Batillariinae  | <i>Tiarapirenella</i> | <i>hungarica</i>        | (Brocchi, 1814)   | u        | 1        | 0       | 0    | Langhian    | 13.8      | 14.7      | Badenian                          | (low.16.063113 | 13.8      | 14.7                   | Badenian                    | (low.16.063113 | 13.8                                        | 14.7                                     | Czech Republi Ústec                                |                                |
| Cerithioidea     | Batillariidae     | Batillariinae  | <i>Tiarapirenella</i> | <i>hungarica</i>        | Halaváts, 1884    | u        | 1        | 0       | 0    | Langhian    | 13.8      | 14.7      | Badenian                          | (low.16.063113 | 13.8      | 14.7                   | Badenian                    | (low.16.063113 | 13.8                                        | 14.7                                     | Czech Republi Ústec                                |                                |
| Cerithioidea     | Batillariidae     | Batillariinae  | <i>Granulolabium</i>  | <i>plicatum</i>         | (Brugulière, 1792 | 1.50     | 1        | 0       | 0    | Langhian    | 13.8      | 14.7      | Badenian                          | (low.16.063113 | 13.8      | 14.7                   | Badenian                    | (low.16.063113 | 13.8                                        | 14.7                                     | Czech Republi Ústec                                |                                |
| Cerithioidea     | Batillariidae     | Batillariinae  | <i>Granulolabium</i>  | <i>hornensis</i>        | (Schaffler, 1912) | u        | 1        | 0       | 0    | Langhian    | 13.8      | 14.7      | Badenian                          | (low.16.063113 | 13.8      | 14.7                   | Badenian                    | (low.16.063113 | 13.8                                        | 14.7                                     | Czech Republi Ústec                                |                                |
| Cerithioidea     | Batillariidae     | Batillariinae  | <i>Lampanelia</i>     | <i>volynica</i>         | (Friedberg, 1914  | u        | 1        | 0       | 0    | Langhian    | 13.8      | 14.7      | Badenian                          | (low.16.063113 | 13.8      | 14.7                   | Badenian                    | (low.16.063113 | 13.8                                        | 14.7                                     | Czech Republi Ústec                                |                                |
| Cerithioidea     | Batillariidae     | Batillariinae  | <i>Granulolabium</i>  | <i>pseudoduplicatum</i> | (Friedberg, 1928  | u        | 1        | 0       | 0    | Langhian    | 13.8      | 14.7      | Badenian                          | (low.16.063113 | 13.8      | 14.7                   | Badenian                    | (low.16.063113 | 13.8                                        | 14.7                                     | Czech Republi Ústec                                |                                |
| Tonnoidea        | Bursidae          | Bursinae       | <i>Aspa</i>           | <i>marginata</i>        | (Gmelin, 1791)    | 3.50     | 0        | 1       | 0    | Langhian    | 13.8      | 14.7      | Badenian                          | (low.16.063113 | 13.8      | 14.7                   | Badenian                    | (low.16.063113 | 13.8                                        | 14.7                                     | Czech Republi Ústec                                |                                |
| Tonnoidea        | Bursidae          | Bursinae       | <i>Bursa</i>          | <i>scrobilator</i>      | (Linnaeus, 1758)  | 4.00     | 0        | 0       | 1    | Langhian    | 13.8      | 14.7      | Badenian                          | (low.16.063113 | 13.8      | 14.7                   | Badenian                    | (low.16.063113 | 13.8                                        | 14.7                                     | Czech Republi Ústec                                |                                |
| Tonnoidea        | Bursidae          | Bursinae       | <i>Bursa</i>          | <i>corrugata</i>        | (Perry, 1811)     | 3.50     | 0        | 0       | 1    | Langhian    | 13.8      | 14.7      | Badenian                          | (low.16.063113 | 13.8      | 14.7                   | Badenian                    | (low.16.063113 | 13.8                                        | 14.7                                     | Czech Republi Ústec                                |                                |
| Tonnoidea        | Bursidae          | Personidae     | <i>Distorsio</i>      | <i>cancelina</i>        | (Lamarck, 1803)   | 3.50     | 0        | 0       | 1    | Langhian    | 13.8      | 14.7      | Badenian                          | (low.16.063113 | 13.8      | 14.7                   | Badenian                    | (low.16.063113 | 13.8                                        | 14.7                                     | Czech Republi Ústec                                |                                |
| Tonnoidea        | Bursidae          | Bursinae       | <i>Bursa</i>          | <i>ranelloides</i>      | (Reeve, 1844)     | 3.00     | 0        | 0       | 1    | Langhian    | 13.8      | 14.7      | Badenian                          | (low.16.063113 | 13.8      | 14.7                   | Badenian                    | (low.16.063113 | 13.8                                        | 14.7                                     | Czech Republi Ústec                                |                                |
| Tonnoidea        | Bursidae          | Personidae     | <i>Personopsis</i>    | <i>grasli</i>           | (d'Ancona, 1872   | u        | 0        | 0       | 1    | Langhian    | 13.8      | 14.7      | Badenian                          | (low.16.063113 | 13.8      | 14.7                   | Badenian                    | (low.16.063113 | 13.8                                        | 14.7                                     | Czech Republi Ústec                                |                                |
| Volutoidea       | Cancellariidae    | Cancellarinae  | <i>Scalptia</i>       | <i>polonica</i>         | (Pusch, 1837)     | 2.50     | 0        | 0       | 1    | Langhian    | 13.8      | 14.7      | Badenian                          | (low.16.063113 | 13.8      | 14.7                   | Badenian                    | (low.16.063113 | 13.8                                        | 14.7                                     | Czech Republi Ústec                                |                                |
| Volutoidea       | Cancellariidae    | Cancellarinae  | <i>Pettinia</i>       | <i>inermis</i>          | (Pusch, 1837)     | 3.00     | 0        | 0       | 1    | Langhian    | 13.8      | 14.7      | Badenian                          | (low.16.063113 | 13.8      | 14.7                   | Badenian                    | (low.16.063113 | 13.8                                        | 14.7                                     | Czech Republi Ústec                                |                                |
| Volutoidea       | Cancellariidae    | Cancellarinae  | <i>Solatia</i>        | <i>exwestiana</i>       | (Sacco, 1894)     | u        | 0        | 0       | 1    | Langhian    | 13.8      | 14.7      | Badenian                          | (low.16.063113 | 13.8      | 14.7                   | Badenian                    | (low.16.063113 | 13.8                                        | 14.7                                     | Czech Republi Ústec                                |                                |
| Volutoidea       | Cancellariidae    | Cancellarinae  | <i>Contortia</i>      | <i>fenestrata</i>       | (Eichwald, 1830)  | u        | 0        | 0       | 1    | Langhian    | 13.8      | 14.7      | Badenian                          | (low.16.063113 | 13.8      | 14.7                   | Badenian                    | (low.16.063113 | 13.8                                        | 14.7                                     | Czech Republi Ústec                                |                                |
| Volutoidea       | Cancellariidae    | Cancellarinae  | <i>Sveltia</i>        | <i>lyrata</i>           | (Brocchi, 1814)   | u        | 0        | 0       | 1    | Langhian    | 13.8      | 14.7      | Badenian                          | (low.16.063113 | 13.8      | 14.7                   | Badenian                    | (low.16.063113 | 13.8                                        | 14.7                                     | Czech Republi Ústec                                |                                |
| Volutoidea       | Cancellariidae    | Cancellarinae  | <i>Sveltia</i>        | <i>dertovaricosca</i>   | (Sacco, 1894)     | u        | 0        | 0       | 1    | Langhian    | 13.8      | 14.7      | Badenian                          | (low.16.063113 | 13.8      | 14.7                   | Badenian                    | (low.16.063113 | 13.8                                        | 14.7                                     | Czech Republi Ústec                                |                                |
| Volutoidea       | Cancellariidae    | Cancellarinae  | <i>Calcarata</i>      | <i>vinobonensis</i>     | (Hilber, 1892)    | u        | 0        | 0       | 1    | Langhian    | 13.8      | 14.7      | Badenian                          | (low.16.063113 | 13.8      | 14.7                   | Badenian                    | (low.16.063113 | 13.8                                        | 14.7                                     | Czech Republi Ústec                                |                                |
| Volutoidea       | Cancellariidae    | Cancellarinae  | <i>Bonellitia</i>     | <i>bonellii</i>         | (Bellardi, 1841)  | u        | 0        | 0       | 1    | Langhian    | 13.8      | 14.7      | Badenian                          | (low.16.063113 | 13.8      | 14.7                   | Badenian                    | (low.16.063113 | 13.8                                        | 14.7                                     | Czech Republi Ústec                                |                                |
| Volutoidea       | Cancellariidae    | Cancellarinae  | <i>Scalptia</i>       | <i>spinosa</i>          | (Grateloup, 182   | u        | 0        | 0       | 1    | Langhian    | 13.8      | 14.7      | Badenian                          | (low.16.063113 | 13.8      | 14.7                   | Badenian                    | (low.16.063113 | 13.8                                        | 14.7                                     | Czech Republi Ústec                                |                                |
| Volutoidea       | Cancellariidae    | Cancellarinae  | <i>Contortia</i>      | <i>tortoniana</i>       | (Sacco, 1894)     | u        | 0        | 0       | 1    | Langhian    | 13.8      | 14.7      | Badenian                          | (low.16.063113 | 13.8      | 14.7                   | Badenian                    | (low.16.063113 | 13.8                                        | 14.7                                     | Czech Republi Ústec                                |                                |
| Volutoidea       | Cancellariidae    | Cancellarinae  | <i>Ventriola</i>      | <i>imbricata</i>        | (Hörnes, 1854)    | u        | 0        | 0       | 1    | Langhian    | 13.8      | 14.7      | Badenian                          | (low.16.063113 | 13.8      | 14.7                   | Badenian                    | (low.16.063113 | 13.8                                        | 14.7                                     | Czech Republi Ústec                                |                                |
| Volutoidea       | Cancellariidae    | Cancellarinae  | <i>Bivettella</i>     | <i>dertonensis</i>      | (Bellardi, 1841)  | u        | 0        | 0       | 1    | Langhian    | 13.8      | 14.7      | Badenian                          | (low.16.063113 | 13.8      | 14.7                   | Badenian                    | (low.16.063113 | 13.8                                        | 14.7                                     | Czech Republi Ústec                                |                                |
| Volutoidea       | Cancellariidae    | Cancellarinae  | <i>Periplicaria</i>   | <i>gradata</i>          | (Hörnes, 1854)    | u        | 0        | 0       | 1    | Langhian    | 13.8      | 14.7      | Badenian                          | (low.16.063113 | 13.8      | 14.7                   | Badenian                    | (low.16.063113 | 13.8                                        | 14.7                                     | Czech Republi Ústec                                |                                |
| Volutoidea       | Cancellariidae    | Cancellarinae  | <i>Scalptia</i>       | <i>saccol</i>           | (Hoernes & Auin   | u        | 0        | 0       | 1    | Langhian    | 13.8      | 14.7      | Badenian                          | (low.16.063113 | 13.8      | 14.7                   | Badenian                    | (low.16.063113 | 13.8                                        | 14.7                                     | Czech Republi Ústec                                |                                |
| Volutoidea       | Cancellariidae    | Cancellarinae  | <i>Scalptia</i>       | <i>scrobiculata</i>     | (Hörnes, 1854)    | u        | 0        | 0       | 1    | Langhian    | 13.8      | 14.7      | Badenian                          | (low.16.063113 | 13.8      | 14.7                   | Badenian                    | (low.16.063113 | 13.8                                        | 14.7                                     | Czech Republi Ústec                                |                                |
| Volutoidea       | Cancellariidae    | Cancellarinae  | <i>Trigonostoma</i>   | <i>exgelini</i>         | (Sacco, 1894)     | 2.25     | 0        | 0       | 1    | Langhian    | 13.8      | 14.7      | Badenian                          | (low.16.063113 | 13.8      | 14.7                   | Badenian                    | (low.16.063113 | 13.8                                        | 14.7                                     | Czech Republi Ústec                                |                                |
| Volutoidea       | Cancellariidae    | Cancellarinae  | <i>Pseudobovella</i>  | <i>nysti</i>            | (Hörnes, 1854)    | u        | 0        | 0       | 1    | Langhian    | 13.8      | 14.7      | Badenian                          | (low.16.063113 | 13.8      | 14.7                   | Badenian                    | (low.16.063113 | 13.8                                        | 14.7                                     | Czech Republi Ústec                                |                                |
| Volutoidea       | Cancellariidae    | Cancellarinae  | <i>C</i>              |                         |                   |          |          |         |      |             |           |           |                                   |                |           |                        |                             |                |                                             |                                          |                                                    |                                |













| Early Badenian (VB) |      | Early Badenian (central basins) |           | Early Badenian (southern basins) |                                        | Badenian (southadriatic)               |  |
|---------------------|------|---------------------------------|-----------|----------------------------------|----------------------------------------|----------------------------------------|--|
| 13.8                | 14.7 | Badenian (mit16.183217)         | 47,918518 | Austria                          | Enzesfeld                              | Enzesfeld                              |  |
| 13.8                | 14.7 | Badenian (mit16.232640)         | 48,005430 | Austria                          | Baden (Möllersdorf, Traisnitz)         | Baden                                  |  |
| 13.8                | 14.7 | Badenian (mit16.214336)         | 47,984392 | Austria                          | Baden-Soos                             | Baden-Soos                             |  |
| 13.8                | 14.7 | Badenian (mit16.213590)         | 47,965330 | Austria                          | Bad Vöslau                             | Bad Vöslau                             |  |
| 13.8                | 14.7 | Badenian (mit16.396266)         | 48,549627 | Austria                          | Niederleis                             | Niederleis, Nodendorf                  |  |
| 13.8                | 14.7 | Badenian (mit16.202252)         | 47,960149 | Austria                          | Gaimfn                                 | Gaimfn                                 |  |
| 13.8                | 14.7 | Badenian (mit16.202252)         | 48,788892 | Czech Republic                   | Šedlec u Sedlce (= Forstebch)          | Šedlec u Sedlce (= Forstebch)          |  |
| 13.8                | 14.7 | Badenian (mit16.342945)         | 48,805560 | Czech Republic                   | Mikulov                                | Mikulov                                |  |
| 13.8                | 14.7 | Badenian (mit16.151869)         | 47,937708 | Austria                          | Berndorf (St. Veit and der Triesting)  | Berndorf (St. Veit and der Triesting)  |  |
| 13.8                | 14.7 | Badenian (mit16.663112)         | 48,751063 | Austria                          | Steinbrunn                             | Steinbrunn                             |  |
| 13.8                | 14.7 | Badenian (mit16.339052)         | 48,297305 | Austria                          | Vienna/Grinz/Vienna/Grinzang/Ottakring | Vienna/Grinz/Vienna/Grinzang/Ottakring |  |
| 13.8                | 14.7 | Badenian (mit14.586657)         | 47,222931 | Austria                          | Pöls                                   | Pöls                                   |  |
| 13.8                | 14.7 | Badenian (mit15.557723)         | 46,721419 | Austria                          | Gamitz                                 | Gamitz                                 |  |
| 13.8                | 14.7 | Badenian (mit15.557723)         | 46,721419 | Austria                          | St. Florian                            | St. Florian, Gamitz, Wetzelsdorf       |  |
| 13.8                | 14.7 | Badenian (mit16.342945)         | 47,711482 | Austria                          | Forchtenstein/Forchtenau, Matersburg   | Forchtenstein/Forchtenau, Matersburg   |  |
| 13.8                | 14.7 | Badenian (mit16.593821)         | 47,678387 | Hungary                          | Sopron                                 | Sopron                                 |  |
| 13.8                | 14.7 | Badenian (mit17.323339)         | 48,352094 | Slovakia                         | Modra-Kaľov, Modra-Kaľov               | Modra-Kaľov, Modra-Kaľov               |  |
| 13.8                | 14.7 | Badenian (mit20.396365)         | 48,212077 | Hungary                          | Borsodbota                             | Borsodbota                             |  |
| 13.8                | 14.7 | Badenian (mit18.262917)         | 46,046117 | Hungary                          | Bán                                    | Bán                                    |  |
| 13.8                | 14.7 | Badenian (mit17.779712)         | 47,123082 | Hungary                          | Bánd                                   | Bánd                                   |  |
| 13.8                | 14.7 | Badenian (mit17.750000)         | 47,133330 | Hungary                          | Herend-Márk, Herend-Márk               | Herend-Márk, Herend-Márk               |  |
| 13.8                | 14.7 | Badenian (mit18.495400)         | 46,256800 | Hungary                          | Hidas                                  | Hidas                                  |  |
| 13.8                | 14.7 | Badenian (mit18.775501)         | 47,883818 | Hungary                          | Letkcs                                 | Letkcs                                 |  |
| 13.8                | 14.7 | Badenian (mit19.67147)          | 48,004251 | Hungary                          | Mátvarebél/Mátvarebél                  | Mátvarebél/Mátvarebél                  |  |
| 13.8                | 14.7 | Badenian (mit18.211738)         | 46,232384 | Hungary                          | Mecsekpálos/Mecsekpáloske              | Mecsekpálos/Mecsekpáloske              |  |
| 13.8                | 14.7 | Badenian (mit16.047375)         | 48,649220 | Hungary                          | Pécszabolcs                            | Pécszabolcs                            |  |
| 13.8                | 14.7 | Badenian (mit19.723585)         | 48,002385 | Hungary                          | Sámsönháza                             | Sámsönháza                             |  |
| 13.8                | 14.7 | Badenian (mit19.006426)         | 47,864583 | Hungary                          | Szokolya                               | Szokolya                               |  |
| 13.8                | 14.7 | Badenian (mit18.871369)         | 47,816633 | Hungary                          | Scob                                   | Scob                                   |  |
| 14.7                | 16   | Badenian (mit18.156910)         | 47,199511 | Hungary                          | Várpálcia-ino/Várpálcia                | Várpálcia-ino/Várpálcia                |  |
| 13.8                | 14.7 | Badenian (mit22.369194)         | 45,902642 | Romania                          | Coșteiu de Sus/Coșteiu de Sus          | Coșteiu de Sus/Coșteiu de Sus          |  |
| 13.8                | 14.7 | Badenian (mit22.479694)         | 45,847217 | Romania                          | Lăpușiu de Sus/Lăpușiu de Sus          | Lăpușiu de Sus/Lăpușiu de Sus          |  |
| 13.8                | 14.7 | Badenian (mit22.315620)         | 45,890340 | Romania                          | Nemeșești                              | Nemeșești                              |  |
| 13.8                | 14.7 | Badenian (mit20.453806)         | 44,789394 | Serbia                           | Rakovica                               | Belgrade/Rakovica                      |  |
| 13.8                | 14.7 | Badenian (mit15.927584)         | 45,446794 | Croatia                          | Čremljuha                              | Beška vrela                            |  |
| 13.8                | 14.7 | Badenian (mit17.438573)         | 44,856745 | Bosnia and Herzegovina           | Hrvacani                               | Hrvacani                               |  |
| 13.8                | 14.7 | Badenian (mit22.004384)         | 46,280484 | Romania                          | Minașiu de Sus/Minașiu de Sus          | Minașiu de Sus/Minașiu de Sus          |  |
| 13.8                | 14.7 | Badenian (mit17.438573)         | 44,856745 | Bosnia and Herzegovina           | Milljevići                             | Milljevići                             |  |
| 13.8                | 14.7 | Badenian (mit15.337831)         | 45,843413 | Slovenia                         | Šentjerneja                            | Šentjerneja                            |  |
| 13.8                | 14.7 | Badenian (mit24.186414)         | 43,253754 | Bulgaria                         | Radomirski                             | Radomirski                             |  |
| 13.8                | 14.7 | Badenian (mit24.581599)         | 43,449077 | Bulgaria                         | Open (hills)                           | Openac                                 |  |
| 13.8                | 14.7 | Badenian (mit24.559240)         | 43,485290 | Bulgaria                         | Bivolare                               | Bivolare                               |  |
| 13.8                | 14.7 | Badenian (mit22.491635)         | 43,822048 | Bulgaria                         | Staropattiza                           | Staropattiza                           |  |
| 13.8                | 14.7 | Badenian (mit24.509719)         | 43,384835 | Bulgaria                         | Tárnevo                                | Tárnevo, Yasen, Urovene                |  |
| 13.8                | 14.7 | Badenian (mit22.918543)         | 45,771042 | Bulgaria                         | Butur                                  | Butur                                  |  |
| 12.7                | 13.8 | Badenian (mit23.427296)         | 43,440760 | Bulgaria                         | Dobruša                                | Dobruša                                |  |
| 12.7                | 13.8 | Badenian (mit18.106886)         | 48,523262 | Slovakia                         | Kuznice                                | Kuznice                                |  |















| an (Central Late Badenian (VB             |          | Late Badenian (Carpathian Basin) |                         | Sarmatian |              |
|-------------------------------------------|----------|----------------------------------|-------------------------|-----------|--------------|
| Ritzing                                   | Austria  | 47,611854                        | Badenian (mit16,495849  | 12,7      | Serravallian |
| Zaprešič-Brijuni                          | Croatia  | 45,861230                        | Badenian (mit15,801752  | 12,7      | Serravallian |
| Vienna/Pösch-Vennau/Pöschelsdorf          | Austria  | 48,241138                        | Badenian (mit16,310821  | 12,7      | Serravallian |
| Nová Ves, Rohožník                        | Slovakia | 48,209803                        | Badenian (mit16,974807  | 12,7      | Serravallian |
| Milúš                                     | Slovakia | 48,629131                        | Badenian (mit17,212497  | 12,7      | Serravallian |
| Holubica, Hódy                            | Ukraine  | 49,919808                        | Badenian (mit25,166533  | 12,7      | Serravallian |
| Dryszczów                                 | Poland   | 51,015917                        | Badenian (mit23,729348  | 12,7      | Serravallian |
| Podhorce                                  | Ukraine  | 49,943349                        | Badenian (mit24,987881  | 12,7      | Serravallian |
| Węglinek                                  | Poland   | 51,735943                        | Badenian (mit21,954459  | 12,7      | Serravallian |
| Zalissi (Territ.Zahleč (Salice)           | Ukraine  | 49,961270                        | Badenian (upp25,1649371 | 12,7      | Serravallian |
| Zboriv                                    | Ukraine  | 49,664840                        | Badenian (upp25,140970  | 12,7      | Serravallian |
| Zukowce (Zhukivci)                        | Ukraine  | 49,800493                        | Badenian (upp26,007068  | 12,7      | Serravallian |
| Hollabrunn                                | Austria  | 48,54226                         | Volhynian               | 11,8      | Serravallian |
| Hauskirchen/Hautzendorf                   | Austria  | 48,612824                        | Volhynian               | 11,8      | Serravallian |
| Klapping                                  | Austria  | 46,811629                        | Volhynian               | 11,8      | Serravallian |
| Nexing                                    | Austria  | 48,493324                        | Volhynian               | 11,8      | Serravallian |
| Soceni (Poitit.Soceni)                    | Romania  | 45,367615                        | Volhynian               | 11,8      | Serravallian |
| St. Margarett/St. Margarethen             | Austria  | 47,762537                        | Bessarabian             | 11,60     | Serravallian |
| Várpálcia-ino Várpálcia (Sarmatian)       | Hungary  | 47,199511                        | Volhynian               | 11,8      | Serravallian |
| Vienna/Herta/Vienna/Hertals/Gaudenzdorf/P | Austria  | 48,231392                        | Volhynian               | 11,8      | Serravallian |
| Waldhof                                   | Austria  | 47,103281                        | Volhynian               | 11,8      | Serravallian |
| Wiesen                                    | Austria  | 47,737765                        | Bessarabian             | 11,60     | Serravallian |
| Zukowce (Zhukivci)                        | Ukraine  | 49,800493                        | Volhynian               | 11,8      | Serravallian |
| Slaneč                                    | Slovakia | 48,634864                        | Volhynian               | 11,8      | Serravallian |
