# Supplementary material for: The Central Paratethys Sea—rise and demise of a Miocene European marine biodiversity hotspot
Source: PubMed Central journal article supplement (PMC11250865; doi:10.1038/s41598-024-67370-6), 2024-07-15
Supplement: 41598_2024_67370_MOESM5_ESM.pdf [file 41598_2024_67370_MOESM5_ESM.pdf]

## Beta diversity per time interval and basin

| Time interval/Basin1              | Time interval/Basin2              | Beta div. total | Turnover comp. |
|-----------------------------------|-----------------------------------|-----------------|----------------|
| Eggenburgian                      | Ottningian                        | 0,92            | 0,81           |
| Eggenburgian                      | Karpatian                         | 0,91            | 0,88           |
| Eggenburgian                      | Early Badenian                    | 0,98            | 0,87           |
| Eggenburgian                      | Late Badenian                     | 0,98            | 0,94           |
| Eggenburgian                      | Sarmatian                         | 0,99            | 0,99           |
| Ottningian                        | Eggenburgian                      | 0,92            | 0,81           |
| Ottningian                        | Karpatian                         | 0,99            | 0,97           |
| Ottningian                        | Early Badenian                    | 1,00            | 0,97           |
| Ottningian                        | Late Badenian                     | 1,00            | 0,97           |
| Ottningian                        | Sarmatian                         | 1,00            | 1,00           |
| Karpatian                         | Eggenburgian                      | 0,91            | 0,88           |
| Karpatian                         | Ottningian                        | 0,99            | 0,97           |
| Karpatian                         | Early Badenian                    | 0,90            | 0,29           |
| Karpatian                         | Late Badenian                     | 0,85            | 0,69           |
| Karpatian                         | Sarmatian                         | 0,98            | 0,98           |
| Early Badenian                    | Eggenburgian                      | 0,98            | 0,87           |
| Early Badenian                    | Ottningian                        | 1,00            | 0,97           |
| Early Badenian                    | Karpatian                         | 0,90            | 0,29           |
| Early Badenian                    | Late Badenian                     | 0,74            | 0,33           |
| Early Badenian                    | Sarmatian                         | 0,99            | 0,93           |
| Late Badenian                     | Eggenburgian                      | 0,98            | 0,94           |
| Late Badenian                     | Ottningian                        | 1,00            | 0,97           |
| Late Badenian                     | Karpatian                         | 0,85            | 0,69           |
| Late Badenian                     | Early Badenian                    | 0,74            | 0,33           |
| Late Badenian                     | Sarmatian                         | 0,99            | 0,97           |
| Sarmatian                         | Eggenburgian                      | 0,99            | 0,99           |
| Sarmatian                         | Ottningian                        | 1,00            | 1,00           |
| Sarmatian                         | Karpatian                         | 0,98            | 0,98           |
| Sarmatian                         | Early Badenian                    | 0,99            | 0,93           |
| Sarmatian                         | Late Badenian                     | 0,99            | 0,97           |
| Early Badenian (Carpathian Basin) | Early Badenian (VB)               | 0,52            | 0,49           |
| Early Badenian (Carpathian Basin) | Early Badenian (central basins)   | 0,58            | 0,51           |
| Early Badenian (Carpathian Basin) | Early Badenian (southern basins)  | 0,60            | 0,50           |
| Early Badenian (VB)               | Early Badenian (Carpathian Basin) | 0,52            | 0,49           |
| Early Badenian (VB)               | Early Badenian (central basins)   | 0,52            | 0,46           |
| Early Badenian (VB)               | Early Badenian (southern basins)  | 0,54            | 0,46           |
| Early Badenian (central basins)   | Early Badenian (Carpathian Basin) | 0,58            | 0,51           |
| Early Badenian (central basins)   | Early Badenian (VB)               | 0,52            | 0,46           |
| Early Badenian (central basins)   | Early Badenian (southern basins)  | 0,53            | 0,50           |
| Early Badenian (southern basins)  | Early Badenian (Carpathian Basin) | 0,60            | 0,50           |
| Early Badenian (southern basins)  | Early Badenian (VB)               | 0,54            | 0,46           |
| Early Badenian (southern basins)  | Early Badenian (central basins)   | 0,53            | 0,50           |
| Late Badenian (southern basins)   | Late Badenian (central basins)    | 0,85            | 0,84           |
| Late Badenian (southern basins)   | Late Badenian (VB)                | 0,79            | 0,64           |
| Late Badenian (southern basins)   | Late Badenian (Carpathian Basin)  | 0,87            | 0,78           |
| Late Badenian (central basins)    | Late Badenian (southern basins)   | 0,85            | 0,84           |
| Late Badenian (central basins)    | Late Badenian (VB)                | 0,83            | 0,70           |
| Late Badenian (central basins)    | Late Badenian (Carpathian Basin)  | 0,90            | 0,82           |
| Late Badenian (VB)                | Late Badenian (southern basins)   | 0,79            | 0,64           |
| Late Badenian (VB)                | Late Badenian (central basins)    | 0,83            | 0,70           |
| Late Badenian (VB)                | Late Badenian (Carpathian Basin)  | 0,80            | 0,79           |
| Late Badenian (Carpathian Basin)  | Late Badenian (southern basins)   | 0,87            | 0,78           |
| Late Badenian (Carpathian Basin)  | Late Badenian (central basins)    | 0,90            | 0,82           |
| Late Badenian (Carpathian Basin)  | Late Badenian (VB)                | 0,80            | 0,79           |

## Multiple-site dissimilarity and turnover

| Time interval  | Beta div. total | Turnover comp. |
|----------------|-----------------|----------------|
| Early Badenian | 0,671           | 0,616          |
| Late Badenian  | 0,878           | 0,824          |
